# Supplementary material for: Short- and long-term effects of concurrent aerobic and resistance training on circulating irisin levels in overweight or obese individuals: a systematic review and meta-analysis of randomized controlled trials
Source: PeerJ. 2024 Sep 19;12:e17958. doi: 10.7717/peerj.17958 (PMC11416761; doi:10.7717/peerj.17958)
Supplement: Supplemental Information 7 [file peerj-12-17958-s007.xlsx]

## Sheet: Sheet1
	experimental group			control group
Inclusion of studies	M	SD	N	M1	SD1	N1
Bita Azimi Rashti(HCL+MCC) 2019	1.89	0.56	29	1.34	0.4	10
Morteza Motahari Rad（AR） 2023	18.4	5.1	15	14.8	4.1	13
Morteza Motahari Rad（RA） 2023	18.1	4.7	15	14.8	4.1	13
Nafiseh Ghodrati PhD Candidate 2023	4.4	3	12	2.9	0.5	9
Sasan Amanat 2020	9.47	1.19	15	9.07	1.41	14
Aria Dianatinasab 2020	8.78	1.33	13	9.02	1.33	15
Desiana Merawati 2023	1431.51	694.44	9	378.31	91.99	7
Karol Makiel (Week 12)2023	11.24	8.92	16	12.37	10.59	15
Karol Makiel (Week 6)2023	14.16	12.2	16	5.87	5.87	15
Ebrahim Banitalebi 2019	358.57	142.12	14	279.29	108.73	14
Mingxian Chen 2023	212.987	74.459	15	176.623	62.338	14
