# Supplementary material for: Short- and long-term effects of concurrent aerobic and resistance training on circulating irisin levels in overweight or obese individuals: a systematic review and meta-analysis of randomized controlled trials
Source: PeerJ. 2024 Sep 19;12:e17958. doi: 10.7717/peerj.17958 (PMC11416761; doi:10.7717/peerj.17958)
Supplement: Supplemental Information 10 [file peerj-12-17958-s010.xlsx]

## Sheet: Sheet1
English-language codebook
Chinese	English	explanation
鸢尾素	Irisin	A hormone involved in exercise-induced metabolic effects.
FNDC5	FNDC5	Precursor protein of Irisin, associated with exercise metabolism.
同期	Concurrent	Actions or events occurring at the same time.
同时	Simultaneous	Happening, existing, or done at the same time.
结合/联合	Combined	Joined together or united in purpose.
有氧	Aerobic	Relating to or denoting exercise that improves or is intended to improve the efficiency of the body's cardiovascular system in absorbing and transporting oxygen.
耐力	Endurance	The ability to sustain prolonged physical or mental effort.
抗阻	Resistance	Refers to exercises that use resistance to induce muscular contraction, building strength, anaerobic endurance, and size of skeletal muscles.
力量	Strength	The ability of a muscle or group of muscles to exert force against resistance.
顺序	Sequential	Forming or following in a logical order or sequence.
中国知网/万方数据库	China National Knowledge Infrastructure(CNKI)/Wan Fang Database	CNKI (China National Knowledge Infrastructure) and Wanfang Database are comprehensive digital databases providing access to a wide range of academic resources, including journal articles, dissertations, conference papers, and more across various disciplines in China.
全部	All	Selecting 'All' during a search typically means that the search is not limited to specific databases or document types but includes all relevant resources. This option allows researchers to obtain more comprehensive search results, encompassing various types of academic materials such as journal articles, periodicals, conference papers, and theses.
